# Supplementary material for: Genome-wide survey, characterization, and expression analysis of bZIP transcription factors in Chenopodium quinoa
Source: PubMed Central journal article supplement (PMC7466520; doi:10.1186/s12870-020-02620-z), 2020-09-01
Supplement: 12870_2020_2620_MOESM10_ESM.pdf [file 12870_2020_2620_MOESM10_ESM.pdf]

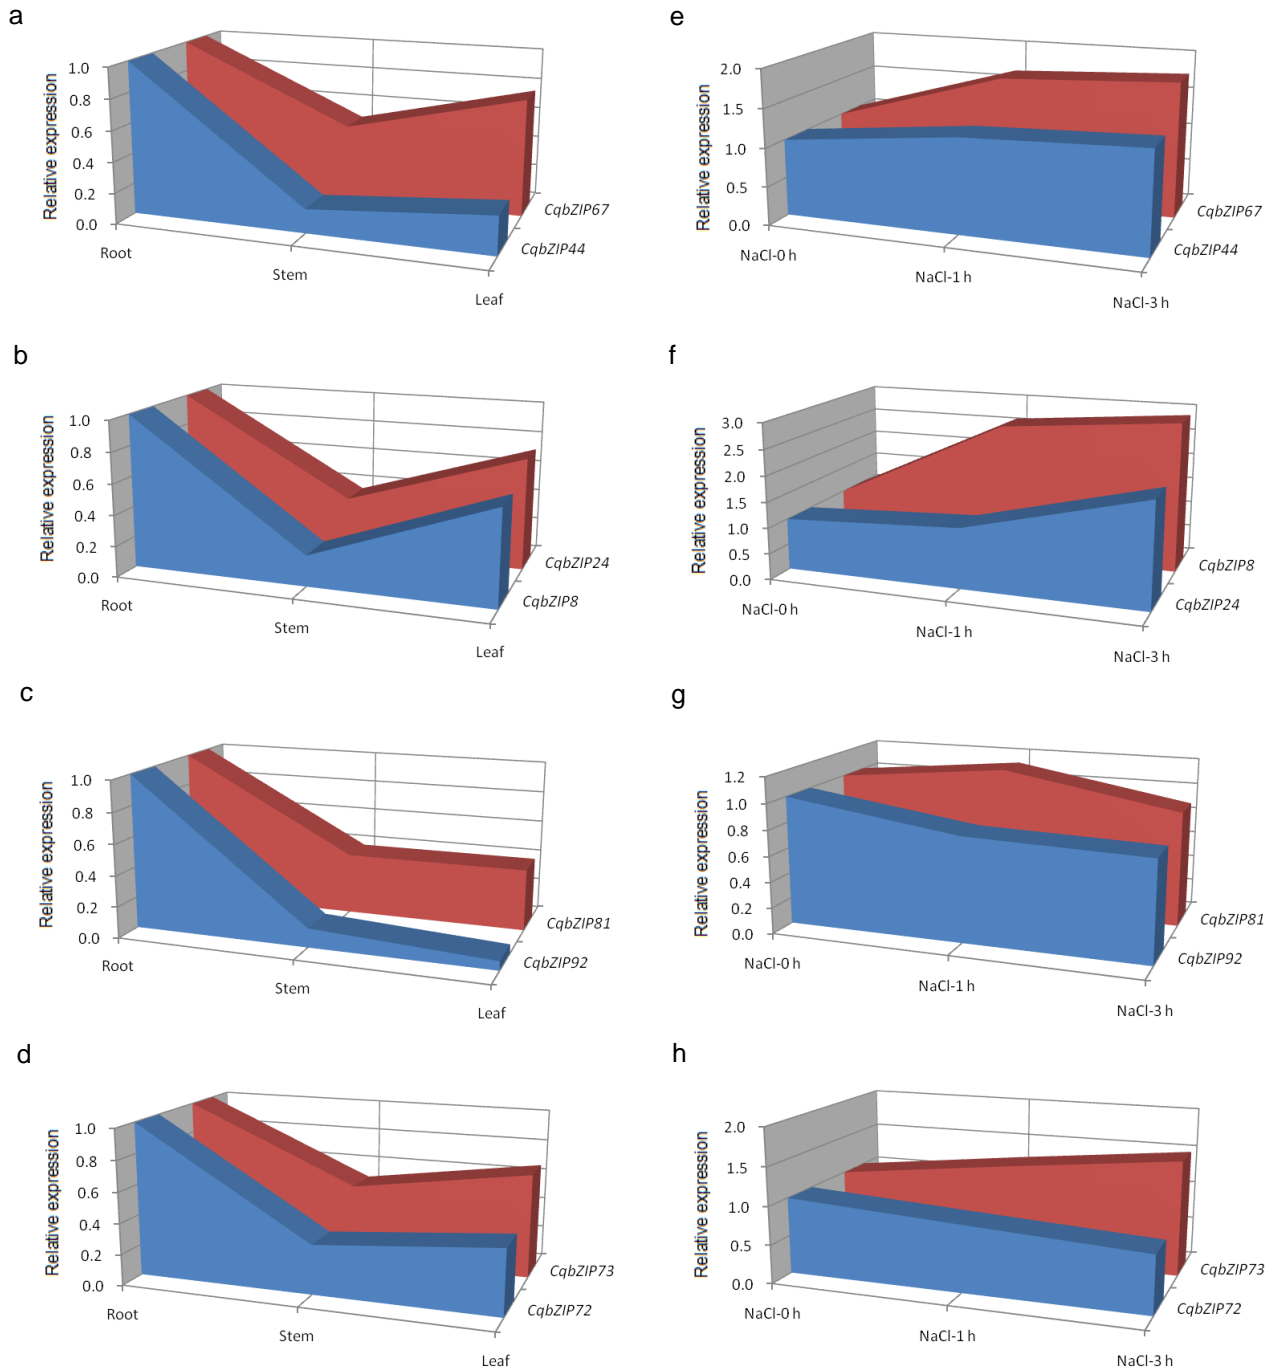

**Additional file 10:** Expression patterns of some duplicated *CqbZIP* genes in different organs (**a–d**) and in roots under salt stress treatment (**e–h**).
