# Supplementary material for: Genome-wide survey, characterization, and expression analysis of bZIP transcription factors in Chenopodium quinoa
Source: PubMed Central journal article supplement (PMC7466520; doi:10.1186/s12870-020-02620-z), 2020-09-01
Supplement: 12870_2020_2620_MOESM11_ESM.pdf [file 12870_2020_2620_MOESM11_ESM.pdf]

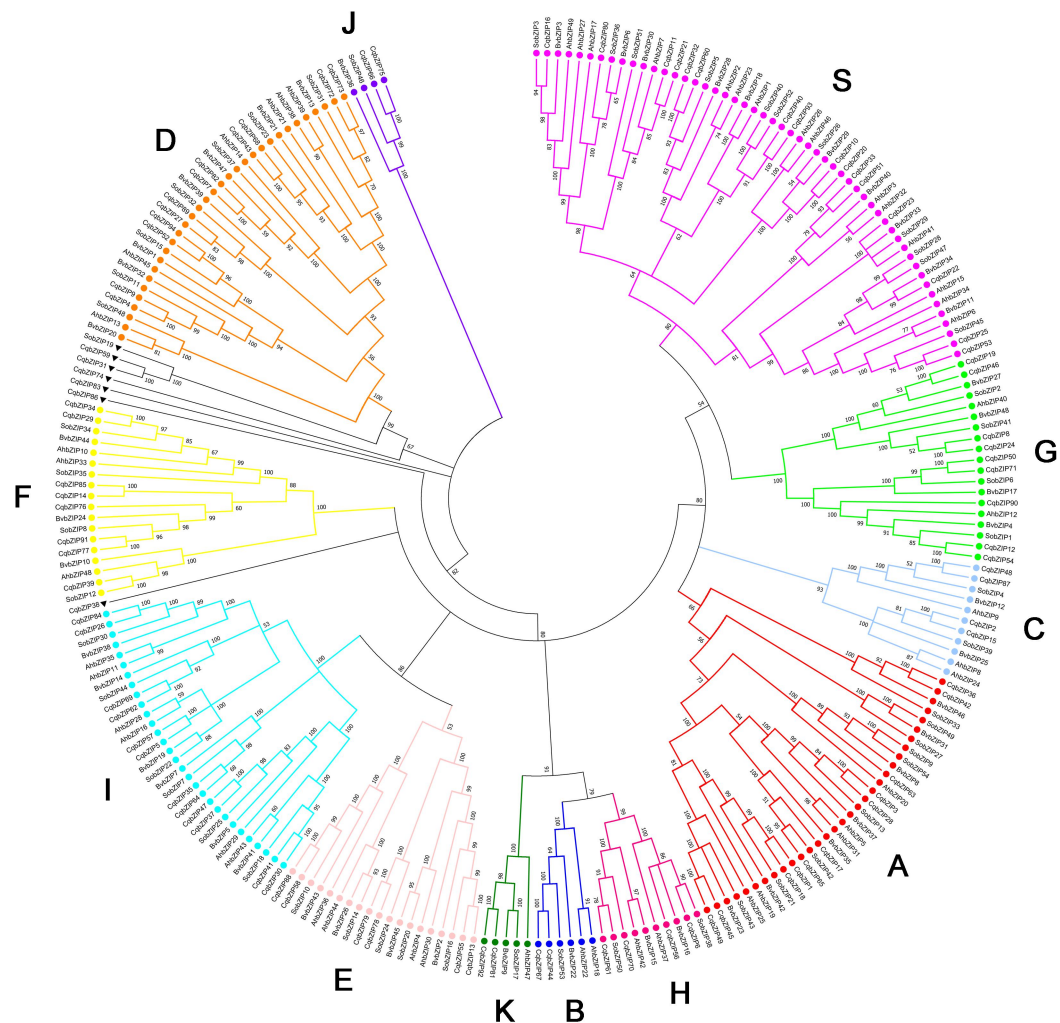

**Additional file 11:** Phylogenetic relationships of the bZIPs in quinoa, spinach, beet, and amaranth.

Amino acid sequences were aligned using ClustalX and the neighbor-joining (NJ) tree was generated through the MEGA7 program. The subfamilies are labeled and denoted by different colors and the numbers at nodes represent bootstrap support values from 1000 replicates.
